# Supplementary material for: A natural language processing–driven map of the aging research landscape
Source: Aging (Albany NY). 2025 Nov 25;17(11):2778–808. doi: 10.18632/aging.206340 (PMC12705180; doi:10.18632/aging.206340)
Supplement: Supplementary Table 1 [file aging-17-11-206340-s002.xlsx]

## Sheet: Hoja1
Supplementary Table 1. Top 20 stem terms and their TF-IDF scores across topics.
Format	Topic 1: General terms	Topic 2: Healthcare	Topic 3: Cell Biology	Topic 4: Genetics	Topic 5: Analytics	Topic 6: Cell Signaling	Topic 7: Demography	Topic 8: Clinical Tests	Topic 9: Age-Related Decline	Topic 10: Rodent Studies	Topic 11: Clinics	Topic 12: Psychosocial	Topic 13: Oxidative Stress	Topic 14: Physics	Topic 15: Therapeutics	Topic 16: Risk Factors	Topic 17: Development	Topic 18: Cognition	Topic 19: CNS diseases	Topic 20: Skin	Topic 21: Neural tissue	Topic 22: Brain structure	Topic 23: Cancer	Topic 24: Metabolism	Topic 25: Physical activity	Topic 26: Cardiovascular	Topic 27: Gender	Topic 28: Muscle	Topic 29: Bone	Topic 30: Liver and Kidney
"stem" (TF-IDF score)	"cell" (1515.87)	"care" (3070.55)	"cell" (4134.08)	"gene" (1938.81)	"method" (892.37)	"protein" (1415.80)	"year" (1132.16)	"group" (1224.07)	"adult" (1549.09)	"rat" (2255.27)	"patient" (2530.54)	"health" (1440.45)	"oxid" (1356.53)	"temperatur" (807.56)	"treatment" (926.46)	"isk" (1079.67)	"dai" (1066.58)	"cognit" (1623.28)	"diseas" (956.09)	"skin" (913.89)	"neuron" (995.50)	"brain" (1004.13)	"cancer" (806.62)	"diet" (562.26)	"exercis" (909.69)	"arteri" (465.88)	"women" (557.29)	"muscl" (1110.49)	"bone" (911.13)	"liver" (204.93)
	"diseas" (1373.18)	"health" (2064.91)	"senesc" (1974.32)	"express" (1560.08)	"model" (819.62)	"activ" (1244.43)	"associ" (794.10)	"level" (860.29)	"older" (1397.01)	"old" (1400.17)	"elderli" (771.88)	"social" (1288.31)	"mitochondri" (1185.73)	"surfac" (694.31)	"drug" (718.37)	"diseas" (747.26)	"rat" (550.47)	"memori" (1085.20)	"alzheim" (734.74)	"acid" (686.63)	"cell" (665.06)	"region" (583.83)	"life" (487.69)	"insulin" (494.30)	"train" (688.87)	"telomer" (448.15)	"femal" (510.60)	"elderli" (451.41)	"fractur" (339.68)	"frailti" (151.97)
	"review" (1112.28)	"older" (1263.85)	"express" (1100.83)	"cell" (1185.35)	"measur" (650.54)	"cell" (1156.97)	"risk" (603.14)	"concentr" (798.34)	"task" (1069.26)	"mice" (1309.91)	"clinic" (732.84)	"older" (1245.40)	"stress" (1109.70)	"properti" (669.90)	"patient" (544.04)	"diabet" (631.74)	"cell" (476.73)	"impair" (622.97)	"dementia" (677.85)	"collagen" (437.22)	"rat" (444.77)	"imag" (510.49)	"longev" (437.15)	"metabol" (466.94)	"physic" (659.28)	"pressur" (426.58)	"male" (463.53)	"skelet" (307.50)	"osteoporosi" (240.69)	"kidnei" (124.75)
	"mechan" (1105.31)	"servic" (1250.71)	"stem" (892.19)	"mice" (1135.27)	"data" (623.28)	"receptor" (1051.78)	"cognit" (585.20)	"subject" (761.77)	"younger" (747.47)	"month" (1161.70)	"treatment" (690.22)	"depress" (1004.16)	"damag" (808.67)	"materi" (588.07)	"therapi" (539.45)	"factor" (612.03)	"develop" (444.67)	"function" (508.64)	"tau" (597.75)	"cell" (417.01)	"fiber" (388.38)	"matter" (460.11)	"lifespan" (403.98)	"fat" (456.36)	"older" (456.70)	"blood" (422.89)	"men" (420.58)	"strength" (261.28)	"densiti" (209.16)	"alcohol" (105.59)
	"function" (1070.13)	"popul" (1082.91)	"immun" (866.17)	"mutat" (955.80)	"base" (609.50)	"express" (1048.05)	"score" (578.36)	"serum" (717.05)	"young" (704.36)	"young" (930.74)	"diseas" (615.83)	"adult" (863.77)	"cell" (778.85)	"water" (546.59)	"cell" (471.16)	"associ" (553.91)	"postnat" (436.07)	"declin" (490.56)	"brain" (583.39)	"product" (410.18)	"nerv" (374.97)	"volum" (451.40)	"surviv" (396.47)	"intak" (410.21)	"activ" (421.89)	"heart" (388.66)	"sex" (338.16)	"mass" (243.42)	"loss" (208.60)	"transplant" (87.67)
	"role" (1063.72)	"peopl" (1063.03)	"mice" (821.03)	"protein" (870.78)	"test" (569.66)	"regul" (749.02)	"popul" (546.10)	"plasma" (691.91)	"memori" (627.16)	"anim" (805.32)	"case" (599.79)	"life" (856.75)	"dna" (717.48)	"time" (485.24)	"anti" (425.79)	"cardiovascular" (534.10)	"adult" (433.27)	"perform" (485.28)	"amyloid" (577.04)	"extract" (401.87)	"chang" (324.51)	"cortex" (438.57)	"cell" (393.45)	"glucos" (405.20)	"intervent" (418.84)	"hypertens" (342.12)	"sleep" (317.65)	"young" (190.22)	"miner" (200.79)	"hepat" (84.18)
	"process" (1040.56)	"need" (1013.93)	"induc" (781.87)	"dna" (830.81)	"predict" (568.79)	"rat" (742.36)	"women" (542.94)	"patient" (664.75)	"visual" (553.30)	"dai" (688.52)	"infect" (598.68)	"physic" (733.82)	"antioxid" (676.96)	"phase" (474.96)	"treat" (409.59)	"chronic" (518.41)	"period" (415.72)	"task" (482.84)	"patholog" (480.25)	"protein" (368.45)	"membran" (323.27)	"cortic" (383.13)	"span" (328.96)	"obes" (391.83)	"fall" (388.15)	"vascular" (322.28)	"sexual" (230.34)	"forc" (182.60)	"calcium" (155.49)	"cost" (72.31)
	"regul" (889.16)	"nurs" (1002.90)	"activ" (742.62)	"transcript" (731.83)	"assess" (541.51)	"induc" (735.04)	"rate" (540.07)	"control" (570.07)	"perform" (552.11)	"week" (626.51)	"year" (578.31)	"self" (710.59)	"ro" (635.58)	"stabil" (462.63)	"dose" (404.82)	"mortal" (508.54)	"matur" (392.70)	"test" (429.43)	"cognit" (470.00)	"compound" (359.13)	"number" (291.95)	"cognit" (368.43)	"tumor" (322.95)	"bodi" (391.49)	"group" (355.52)	"cardiac" (291.38)	"reproduct" (224.50)	"exercis" (164.05)	"marrow" (119.56)	"rat" (64.17)
	"human" (826.40)	"home" (979.86)	"prolifer" (738.74)	"regul" (725.05)	"analysi" (532.04)	"bind" (728.75)	"patient" (518.07)	"significantli" (560.17)	"group" (547.86)	"cell" (586.40)	"surgeri" (518.99)	"person" (614.82)	"induc" (621.02)	"composit" (456.60)	"clinic" (397.41)	"patient" (480.59)	"growth" (386.40)	"learn" (420.50)	"neuron" (436.75)	"tissu" (356.27)	"layer" (289.47)	"network" (365.82)	"lung" (277.91)	"dietari" (366.91)	"adult" (338.21)	"endotheli" (203.04)	"hormon" (221.07)	"subject" (157.08)	"cell" (114.96)	"oral" (60.39)
	"protein" (825.21)	"research" (947.43)	"tumor" (678.41)	"genet" (616.83)	"us" (530.28)	"inhibit" (714.23)	"older" (515.76)	"valu" (517.20)	"differ" (539.46)	"activ" (529.61)	"risk" (496.18)	"mental" (596.87)	"protein" (604.44)	"structur" (441.92)	"diseas" (360.29)	"stroke" (414.30)	"week" (361.05)	"adult" (372.20)	"neurodegen" (434.39)	"activ" (343.21)	"mice" (285.08)	"white" (334.84)	"mortal" (275.71)	"vitamin" (342.94)	"muscl" (328.63)	"flow" (202.89)	"year" (181.99)	"function" (155.44)	"women" (109.98)	"donor" (60.38)
	"develop" (821.31)	"commun" (894.60)	"cellular" (668.17)	"genom" (616.32)	"patient" (485.97)	"signal" (711.28)	"health" (500.80)	"differ" (507.76)	"children" (528.31)	"decreas" (526.06)	"symptom" (491.74)	"peopl" (588.40)	"activ" (579.79)	"differ" (399.74)	"improv" (354.95)	"popul" (389.81)	"time" (356.87)	"older" (367.45)	"protein" (372.32)	"content" (309.61)	"brain" (284.25)	"connect" (319.02)	"speci" (271.99)	"weight" (331.59)	"improv" (319.14)	"cardiovascular" (197.11)	"differ" (170.54)	"chang" (140.87)	"mass" (103.51)	"patient" (58.49)
	"recent" (809.94)	"caregiv" (876.80)	"cultur" (658.30)	"associ" (565.73)	"valid" (483.61)	"beta" (687.73)	"cohort" (500.77)	"higher" (487.83)	"particip" (459.91)	"respons" (475.98)	"medic" (487.24)	"cognit" (565.84)	"mitochondria" (537.00)	"high" (375.73)	"efficaci" (336.65)	"inflamm" (388.99)	"earli" (344.86)	"brain" (349.55)	"patient" (345.33)	"human" (291.11)	"express" (263.35)	"mri" (309.65)	"rate" (248.84)	"food" (327.91)	"particip" (292.03)	"patient" (190.39)	"gender" (151.32)	"group" (127.20)	"mice" (91.76)	"smoke" (56.89)
	"metabol" (798.68)	"patient" (869.93)	"respons" (637.27)	"human" (556.05)	"clinic" (462.35)	"alpha" (610.75)	"measur" (493.31)	"year" (483.70)	"respons" (449.87)	"group" (470.83)	"care" (477.30)	"associ" (559.51)	"oxygen" (518.82)	"condit" (365.66)	"therapeut" (335.60)	"inflammatori" (384.57)	"birth" (342.40)	"dementia" (338.22)	"disord" (343.57)	"concentr" (284.47)	"type" (261.05)	"cerebr" (308.70)	"genet" (235.53)	"acid" (301.45)	"cognit" (276.45)	"cell" (189.92)	"group" (137.94)	"activ" (126.79)	"patient" (77.95)	"cell" (50.11)
	"cellular" (798.29)	"social" (859.49)	"human" (634.99)	"senesc" (530.18)	"differ" (461.75)	"level" (596.63)	"individu" (485.02)	"blood" (474.39)	"relat" (447.05)	"level" (460.20)	"hospit" (476.00)	"symptom" (557.03)	"reactiv" (456.47)	"chang" (362.34)	"cancer" (322.95)	"health" (382.50)	"chang" (333.93)	"associ" (337.03)	"progress" (323.79)	"fraction" (259.50)	"synapt" (259.30)	"chang" (304.65)	"popul" (233.77)	"lipid" (272.11)	"program" (274.70)	"length" (189.33)	"older" (134.40)	"loss" (125.05)	"risk" (75.49)	"mice" (49.83)
	"relat" (792.68)	"medic" (856.73)	"cancer" (634.34)	"identifi" (509.70)	"sampl" (456.16)	"mrna" (578.98)	"data" (471.16)	"correl" (459.64)	"subject" (441.76)	"male" (433.24)	"diagnosi" (472.00)	"particip" (545.99)	"autophagi" (443.79)	"solut" (361.02)	"skin" (321.59)	"preval" (358.16)	"stage" (325.17)	"deficit" (331.92)	"parkinson" (321.08)	"rat" (255.29)	"morpholog" (257.52)	"function" (287.51)	"gene" (233.22)	"rat" (266.69)	"function" (265.85)	"diseas" (160.42)	"level" (133.46)	"fiber" (123.03)	"decreas" (74.05)	"health" (48.70)
	"pathwai" (776.12)	"polici" (712.81)	"differenti" (631.10)	"mutant" (507.54)	"perform" (453.02)	"kinas" (555.74)	"particip" (462.93)	"compar" (455.82)	"cognit" (435.83)	"chang" (404.70)	"popul" (469.85)	"relationship" (521.99)	"senesc" (430.34)	"process" (357.04)	"trial" (320.81)	"pain" (322.16)	"neonat" (306.47)	"relat" (298.83)	"associ" (293.30)	"oxid" (241.98)	"lesion" (254.38)	"structur" (285.95)	"death" (229.07)	"supplement" (262.23)	"perform" (258.61)	"rat" (154.77)	"life" (114.87)	"old" (121.25)	"format" (73.11)	"diseas" (46.67)
	"understand" (775.89)	"dementia" (698.06)	"protein" (565.79)	"mous" (497.03)	"evalu" (442.54)	"neuron" (555.49)	"estim" (452.33)	"signific" (452.56)	"year" (427.90)	"induc" (402.00)	"therapi" (448.60)	"live" (493.60)	"cellular" (421.71)	"mechan" (349.84)	"us" (316.29)	"older" (311.37)	"life" (304.54)	"abil" (270.75)	"clinic" (284.37)	"amino" (236.12)	"dai" (250.61)	"magnet" (263.11)	"live" (215.73)	"energi" (258.16)	"strength" (252.56)	"vessel" (149.31)	"associ" (110.53)	"older" (119.23)	"cortic" (71.78)	"renal" (44.50)
	"immun" (767.17)	"provid" (693.49)	"tissu" (558.62)	"cancer" (495.84)	"techniqu" (436.77)	"mice" (552.45)	"men" (448.19)	"mean" (447.67)	"experi" (402.34)	"significantli" (394.25)	"manag" (436.82)	"examin" (487.38)	"speci" (394.21)	"cell" (345.08)	"induc" (314.60)	"caus" (307.23)	"activ" (297.24)	"spatial" (253.44)	"mice" (271.73)	"anti" (233.42)	"area" (247.44)	"rat" (252.96)	"reproduct" (214.23)	"protein" (253.81)	"week" (252.23)	"associ" (142.84)	"rat" (108.77)	"relat" (116.99)	"year" (69.24)	"consumpt" (44.19)
	"chang" (762.13)	"practic" (692.81)	"regul" (551.70)	"methyl" (495.83)	"develop" (433.87)	"pathwai" (522.77)	"sampl" (440.76)	"measur" (428.11)	"process" (397.71)	"adult" (385.67)	"complic" (433.12)	"care" (471.27)	"radic" (379.73)	"strength" (344.66)	"potenti" (305.21)	"relat" (291.32)	"exposur" (293.45)	"mice" (246.66)	"onset" (268.79)	"plant" (225.53)	"muscl" (243.15)	"neuron" (245.42)	"patient" (211.99)	"mice" (247.39)	"balanc" (247.26)	"failur" (140.92)	"higher" (107.83)	"adult" (116.83)	"treatment" (67.85)	"activ" (43.68)
	"discuss" (749.17)	"manag" (687.68)	"gene" (547.40)	"variant" (491.43)	"estim" (431.48)	"mediat" (488.01)	"differ" (438.17)	"decreas" (422.19)	"word" (388.55)	"brain" (377.02)	"syndrom" (433.04)	"commun" (464.01)	"protect" (377.18)	"degre" (341.45)	"activ" (304.62)	"elderli" (289.28)	"level" (281.94)	"execut" (246.45)	"plaqu" (264.40)	"contain" (221.20)	"protein" (240.87)	"area" (244.20)	"senesc" (204.91)	"nutrit" (236.05)	"control" (226.01)	"risk" (130.50)	"bone" (107.06)	"decreas" (116.62)	"men" (67.59)	"associ" (41.73)
